# Supplementary material for: Structure of the Chemical and Genetic Diversity of the True Lavender over Its Natural Range
Source: MDPI journal article supplement (doi:10.3390/plants9121640), 2020-11-24

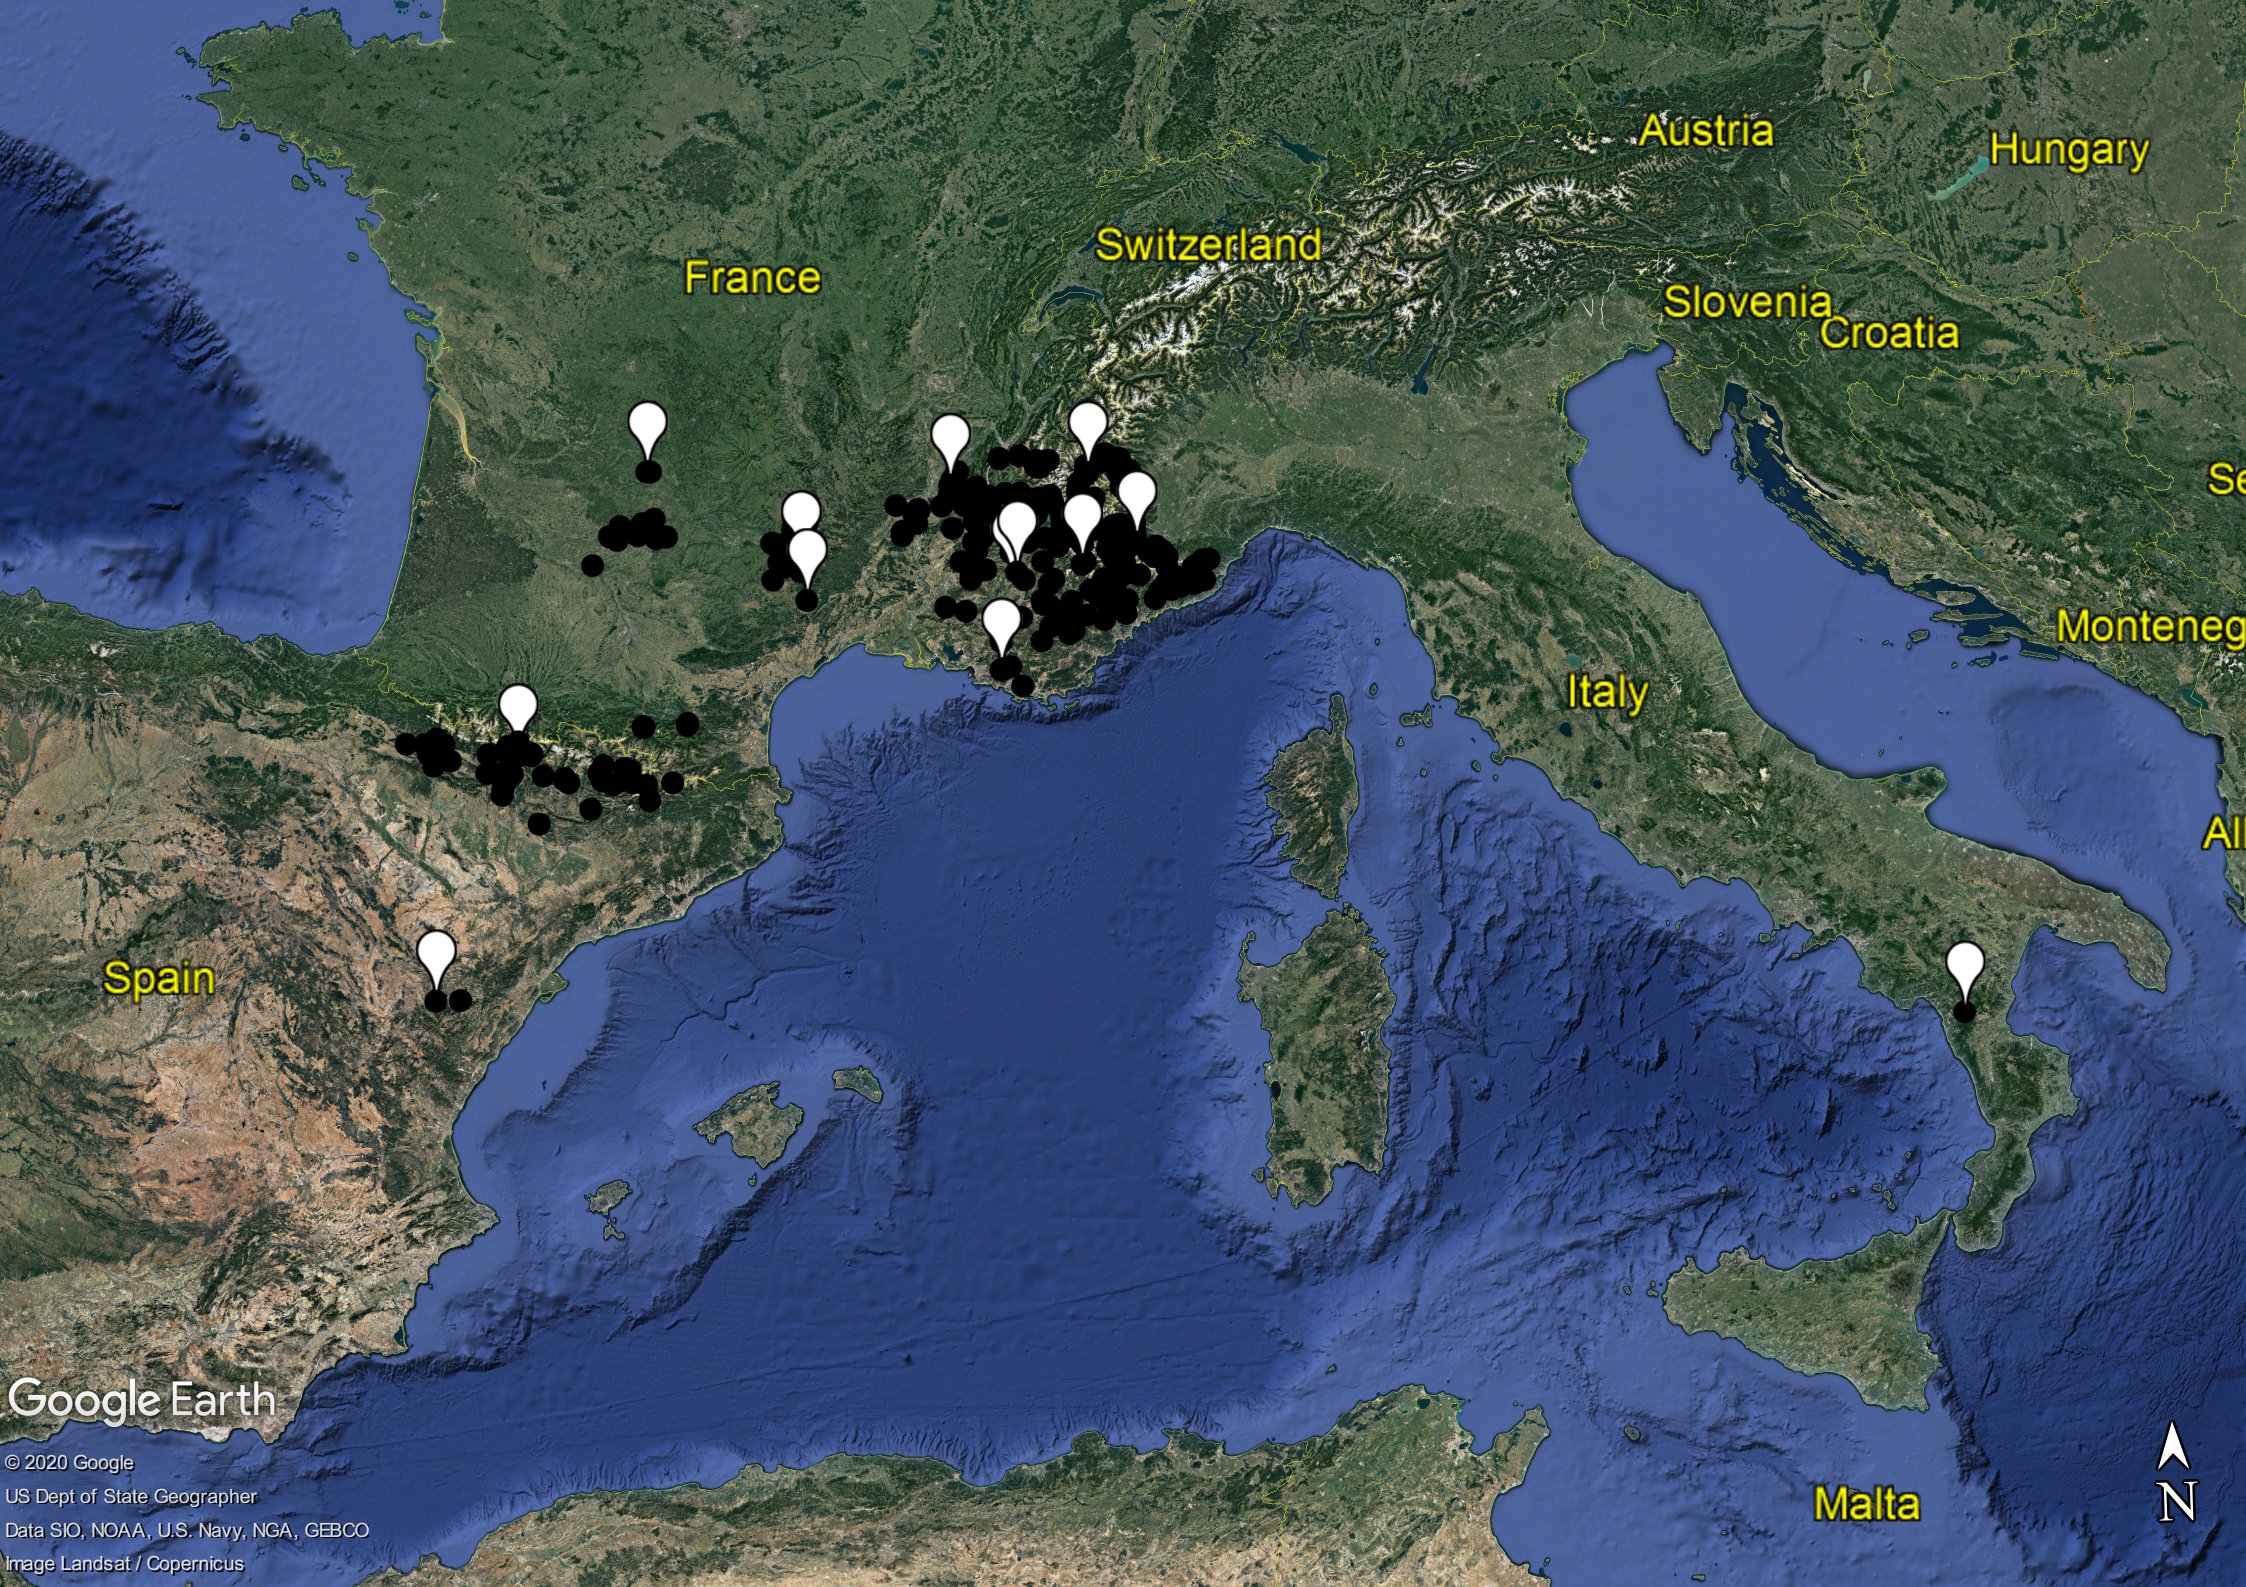

France

Switzerland

Austria

Hungary

Slovenia

Croatia

Italy

Spain

Montenegro

Albania

Malta

Google Earth

© 2020 Google

US Dept of State Geographer

Data SIO, NOAA, U.S. Navy, NGA, GEBCO

Image Landsat / Copernicus

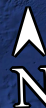

Supplement: s1 [file s1]
